# Supplementary material for: Environmental Status and Geomorphological Characterisation of Seven Black Coral Forests on the Sardinian Continental Shelf (NW Mediterranean Sea)
Source: MDPI journal article supplement (doi:10.3390/biology11050732), 2022-05-11
Supplement: s1 [file s1]

## SUPPLEMENTARY MATERIAL S1

# **Environmental Status and Geomorphological Characterisation of Seven Black Corals Forests from Sardinian Continental Shelf (NW Mediterranean Sea)**

**Davide Moccia<sup>1\*</sup>, Laura Carugati<sup>1</sup>, Maria Cristina Follesa<sup>1</sup>, Rita Cannas<sup>1</sup>, Pierluigi Carbonara<sup>2</sup>, Antonio Pusceddu<sup>1</sup> and & Alessandro Cau<sup>1</sup>**

<sup>1</sup>Department of Life and Environmental Sciences, University of Cagliari, Via T. Fiorelli 1, 09126 Cagliari, Italy.

<sup>2</sup>COISPA Tecnologia & Ricerca, Bari, Italy

\* Correspondence: Davide Moccia: [mocciadavide@unica.it](mailto:mocciadavide@unica.it); Postal address: Dipartimento delle Scienze della Vita e dell'Ambiente, Università di Cagliari, Via Fiorelli 1, Cagliari, 09126, Italy.

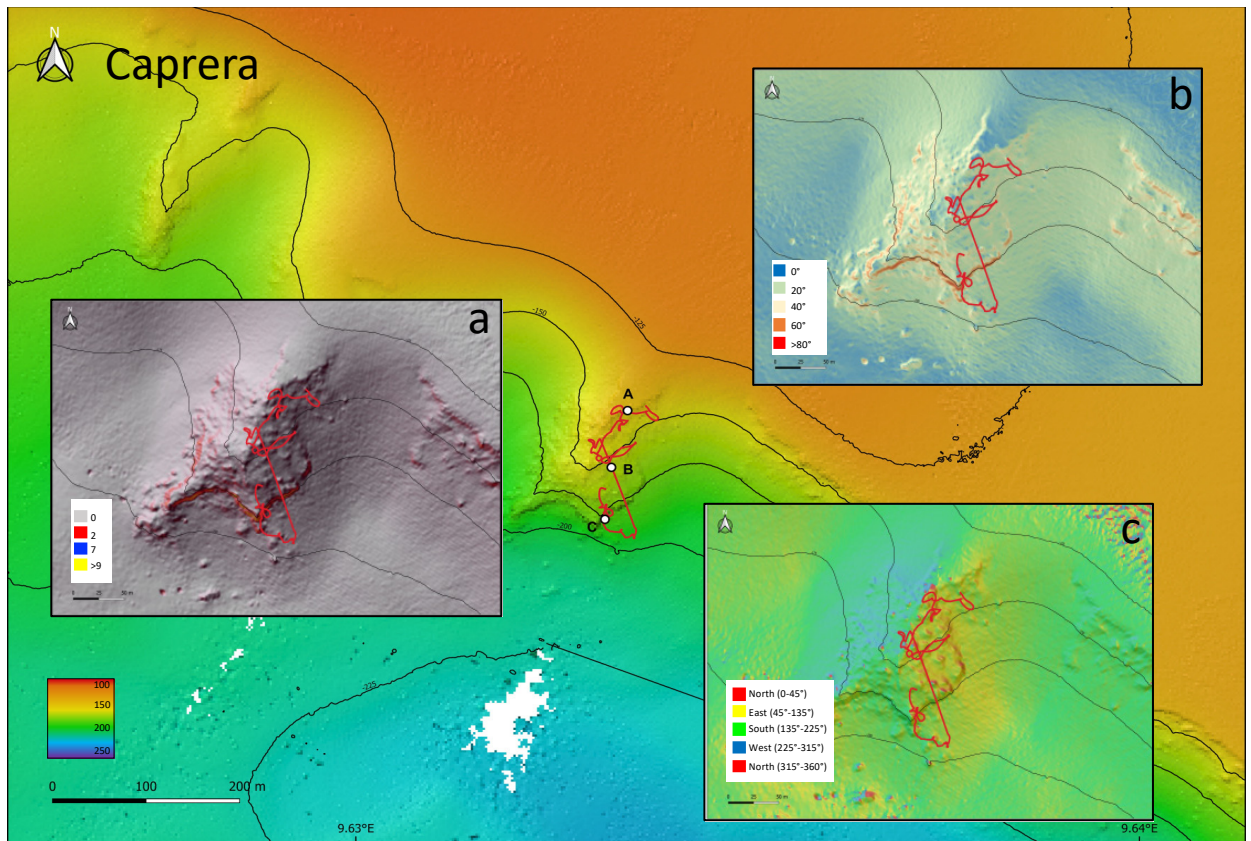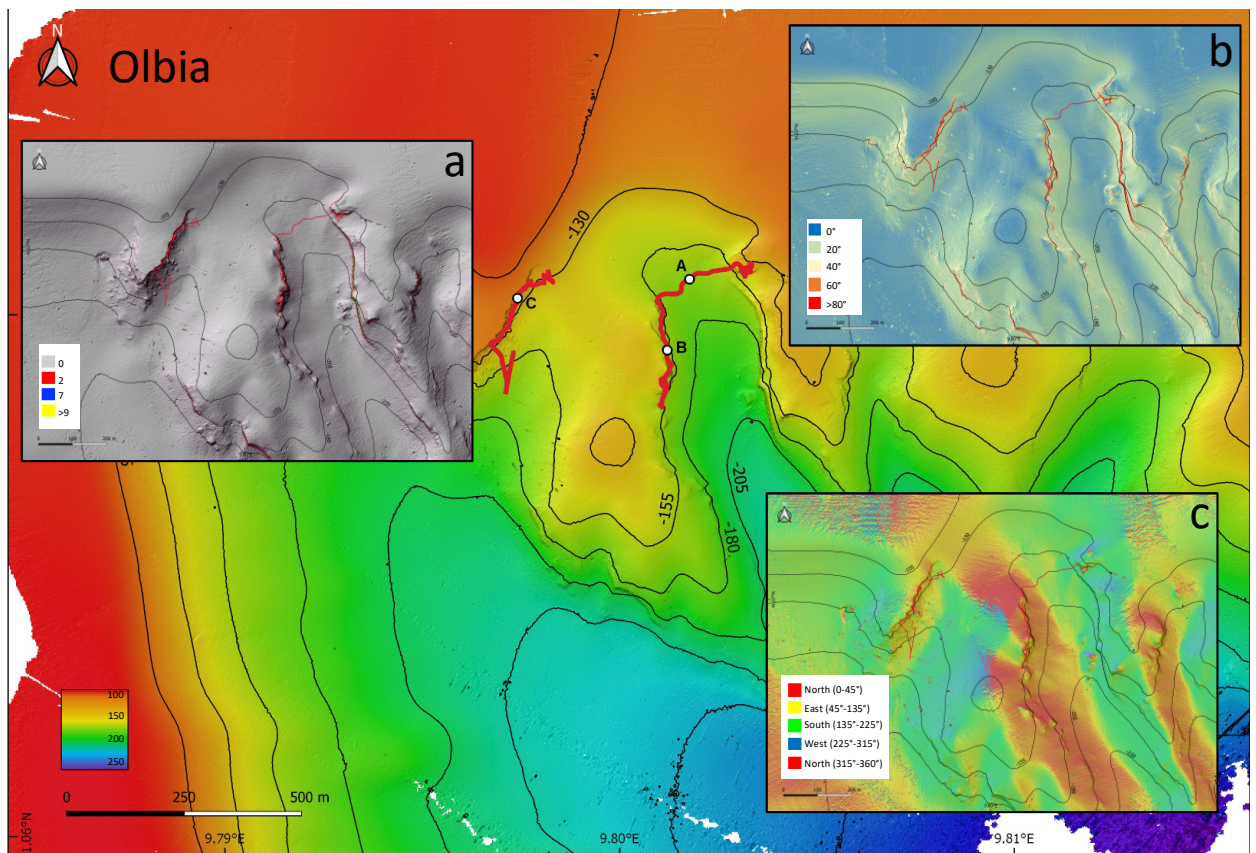



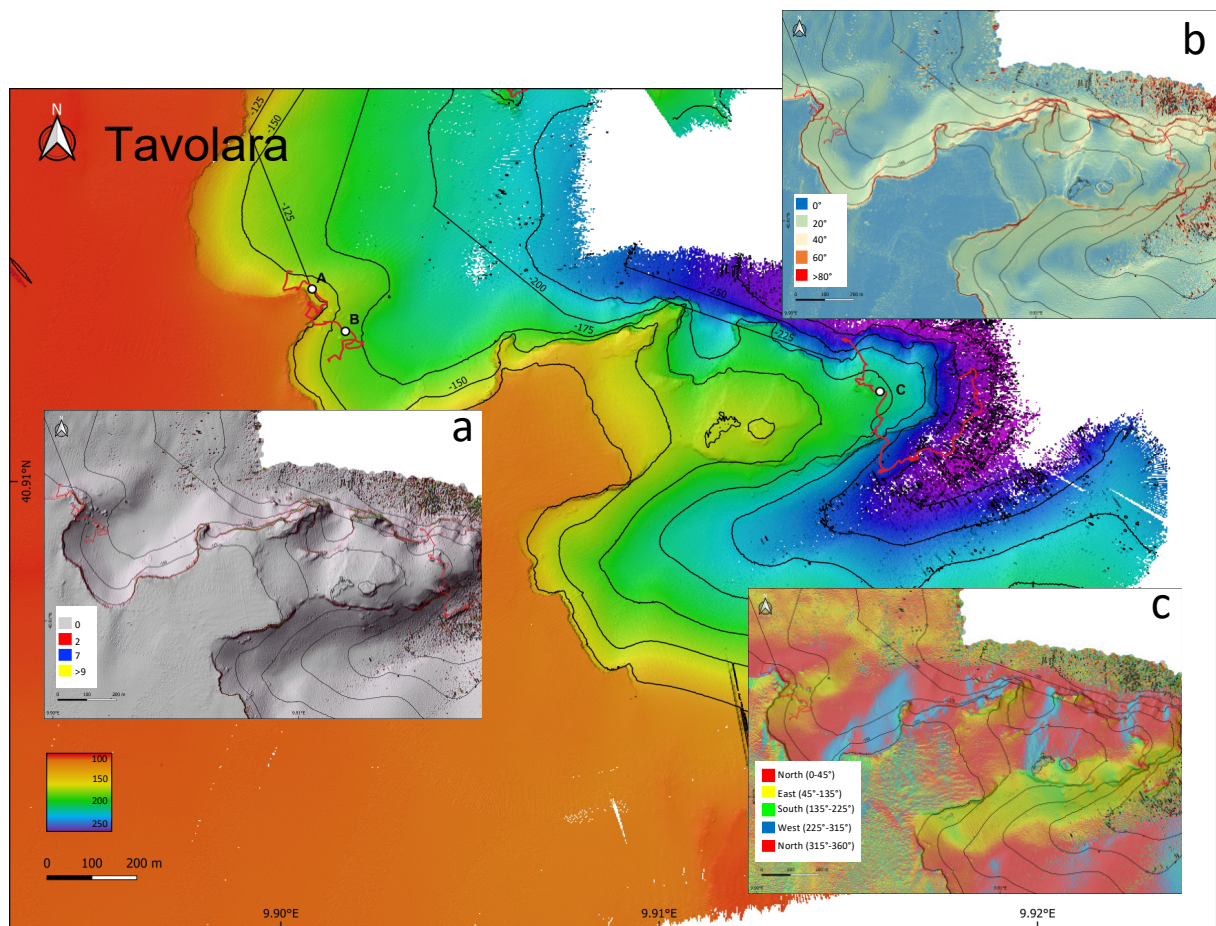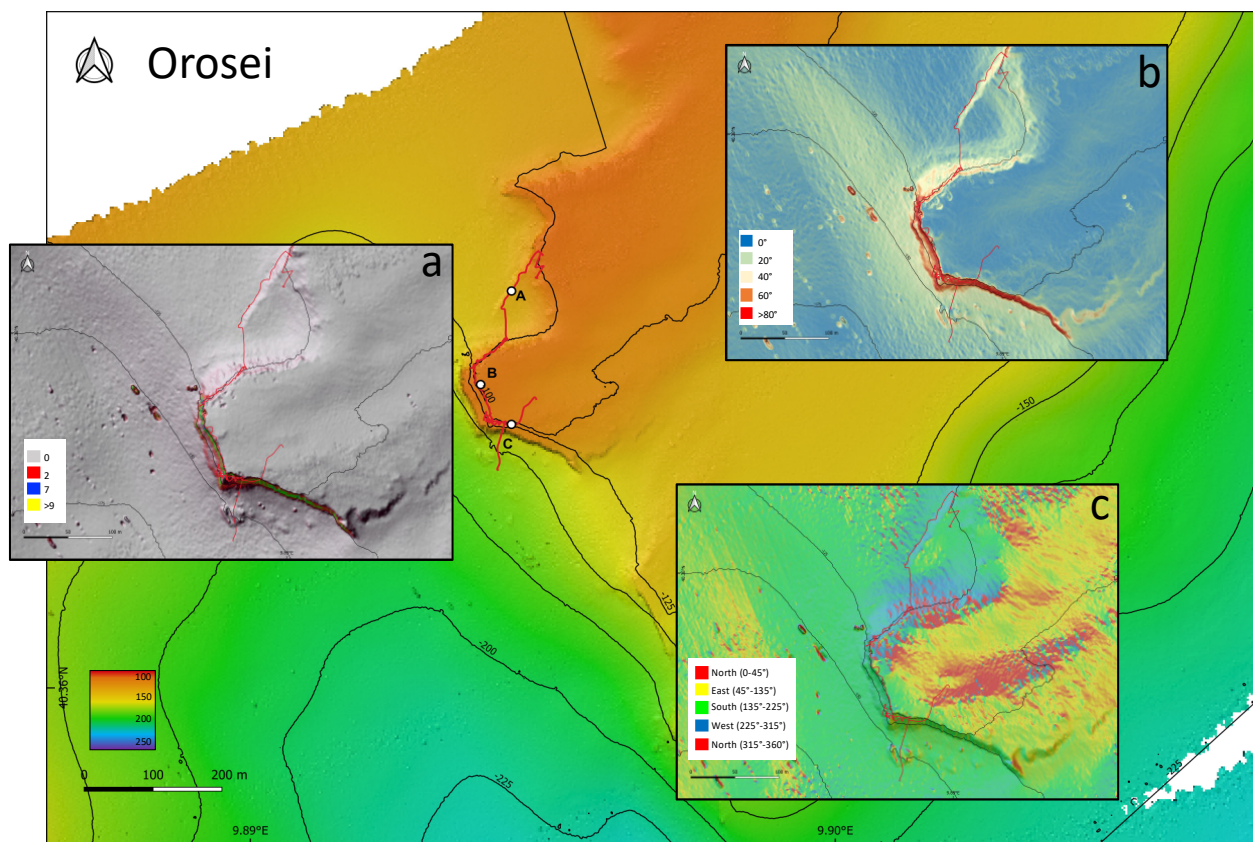



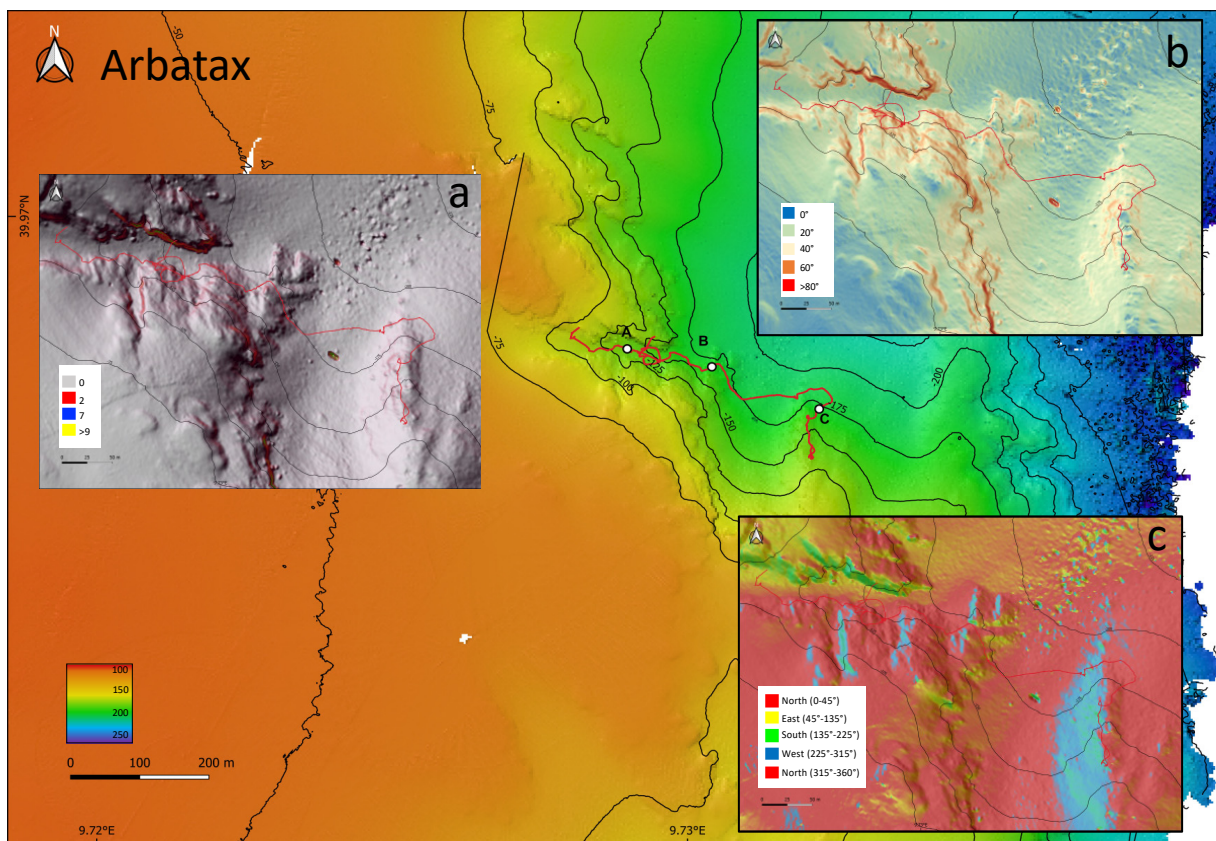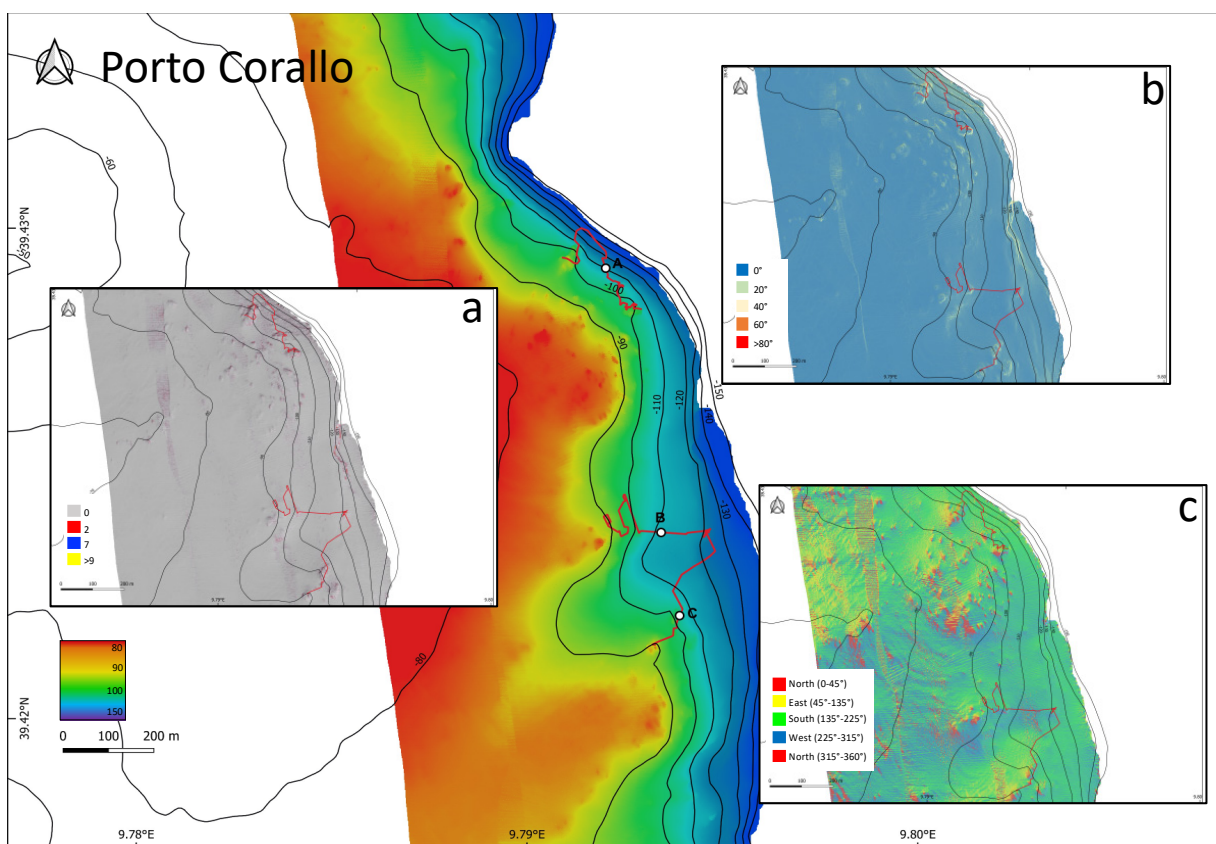



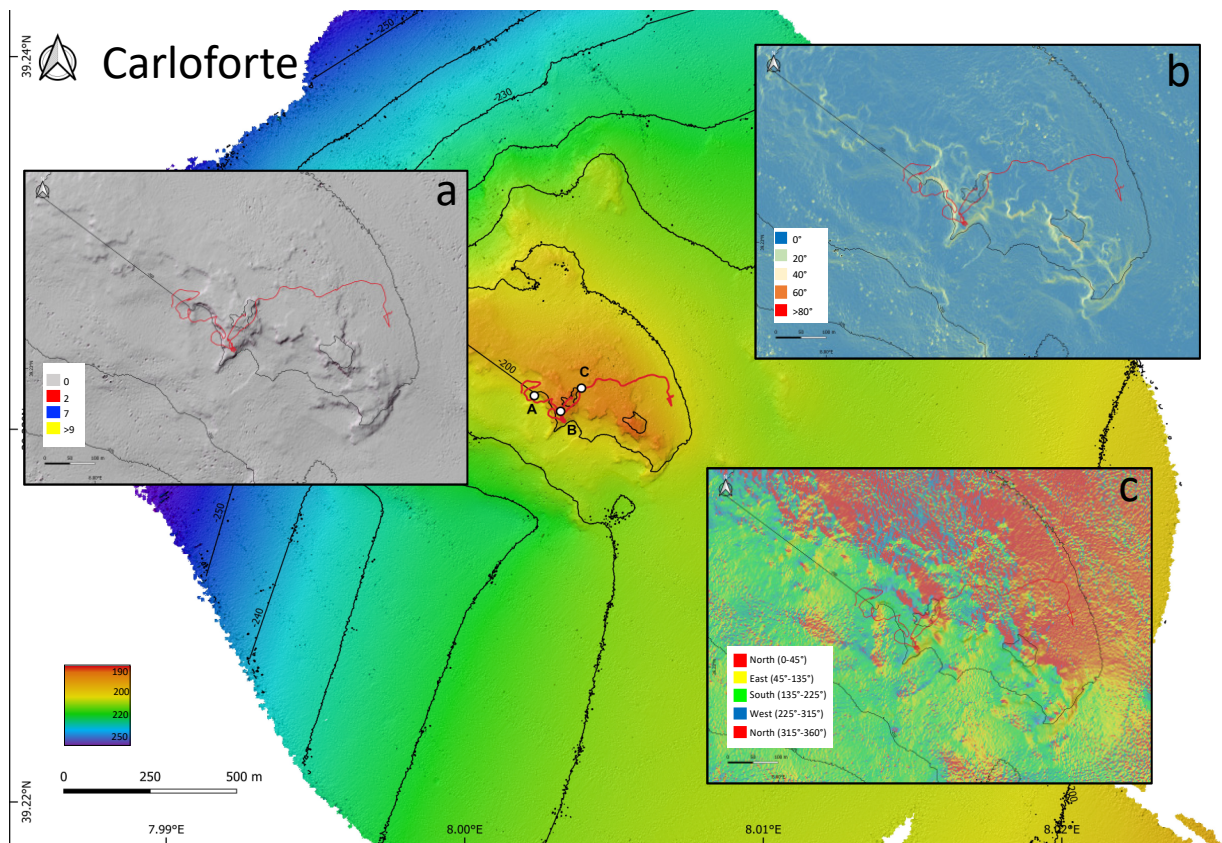

**Figure S1.** Bathymetric, TRI (a), Slope (b) and Aspect (c) map of the study areas from MBES data, showing the ROV navigation tracks (red lines), the sites ID and the approximate location of the 200-m long (A, B, C) transects extracted for the quantitative analyses and application of MACS index.

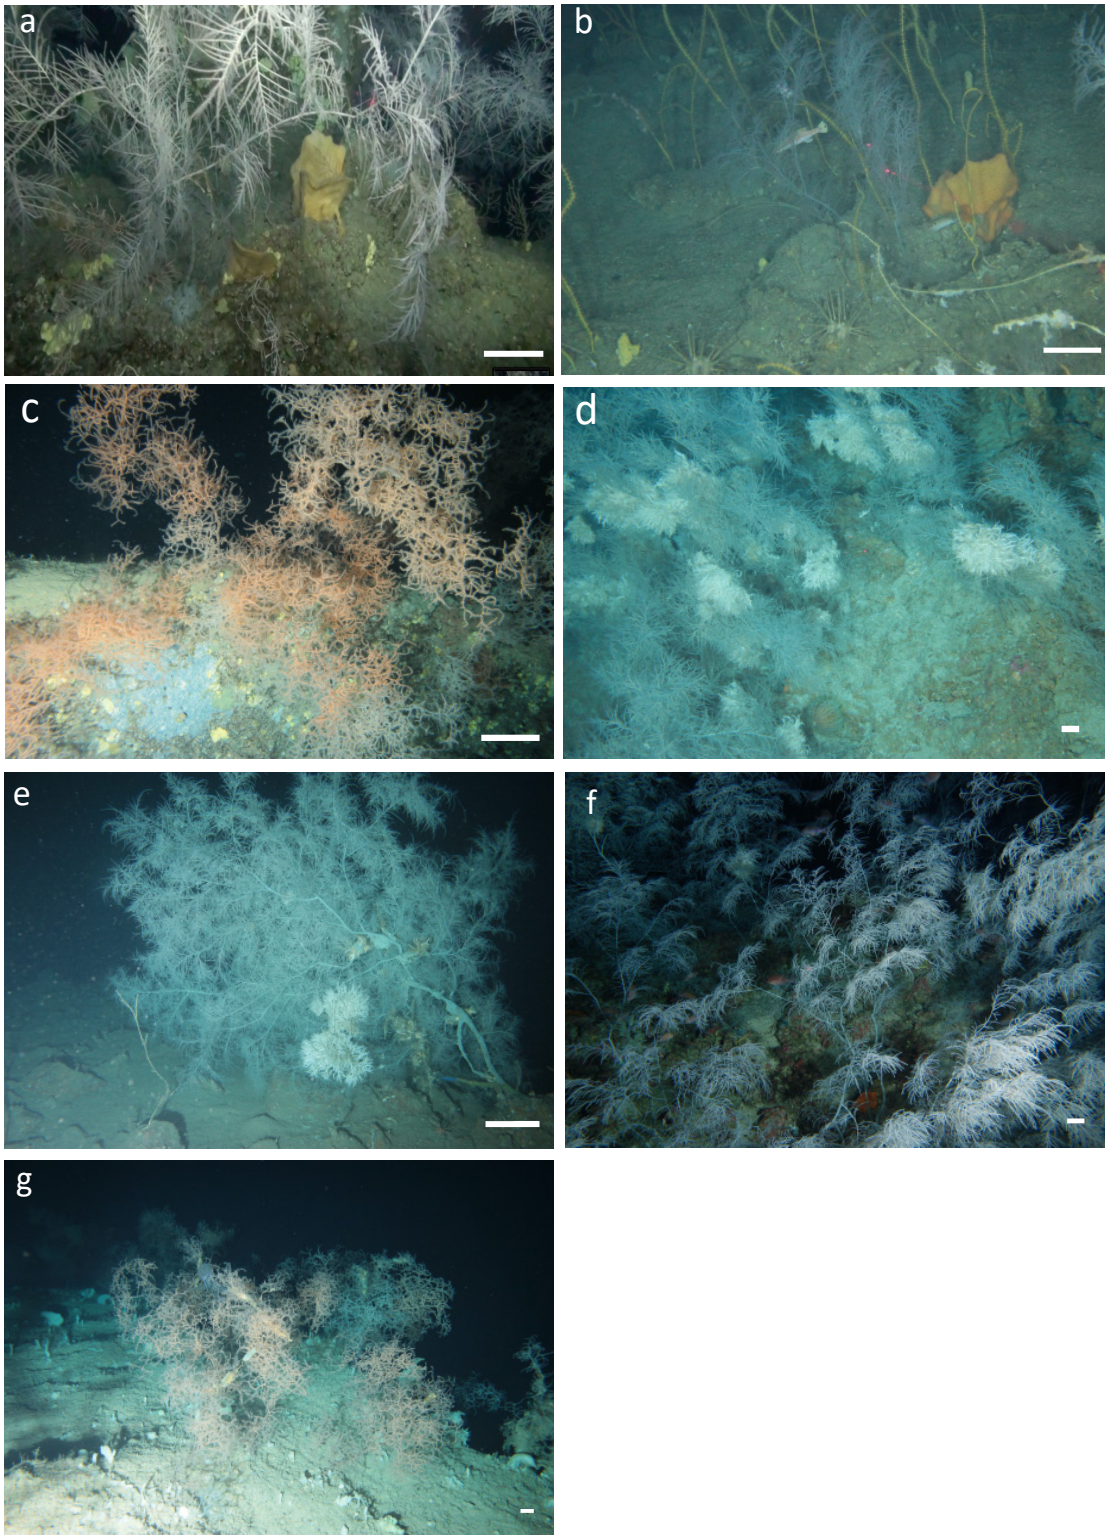

**Figure S2.** Selected ROV images showing black corals colonies at the seven investigated sites. (a) Colonies of *A. subpinnata* observed in Caprera site at 144m depth with colonies of *E. cavolinii* and *P. compressa* underneath the canopy; (b) colonies of *A. subpinnata* in Olbia site at 133m dwell with a dense facies of *V. flagellum*; (c) colonies of *L. glaberrima* on encrusted rocky boulder in Tavolara site at 177m depth; (d) colonies of *A. subpinnata* in Orosei site at 98m depth with several portions of the branches covered by *Salmicina-Filigrana implexa*; (e) big colony of *A. subpinnata* in Arbatax site at 140m depth with portions covered by the epibionts *Salmicina-Filigrana implexa* and other polychaetes species; (f) thick forest of *A. subpinnata* in Porto Corallo site at 95m depth with few individuals of *A. anthias* swimming underneath the canopy; (g) colonies of *L. glaberrima* in Carloforte site at 184m depth with capsules of *S. caniucula* hanging over the branches. Scale bar of approximately 10 cm.



**Table S1:** Geographic and geomorphological characteristics of ROV dives performed in the seven investigated sites. TRI: Terrain Ruggedness Index, TPI: Topographic Positioning Index.

| Site          | Transects code | Coordinates |          |           |          | Length | Depth   | Average | Average | Average | Prevalent |
|---------------|----------------|-------------|----------|-----------|----------|--------|---------|---------|---------|---------|-----------|
|               |                |             |          |           |          |        |         | Slope   | TRI     | TPI     | Aspect    |
|               |                | Start       |          | End       |          |        |         | (m)     |         |         |           |
| Caprera       | CA_T1          | 41.2902 N   | 9.6249 E | 41.2902 N | 9.6257 E | 212    | 121-142 | 25      | 1.2     | 0.014   | E         |
|               | CA_T2          | 41.3058 N   | 9.6335 E | 41.3054 N | 9.6334 E | 256    | 127-144 | 27      | 1.3     | 0.01    | S         |
|               | CA_T3          | 41.3054 N   | 9.6334 E | 41.3048 N | 9.6333 E | 220    | 146-183 | 29      | 1.7     | 0.013   | S         |
| Olbia         | OB_T1          | 41.0707 N   | 9.8028 E | 41.0702 N | 9.8011 E | 205    | 126-147 | 47      | 0.9     | 0.57    | E         |
|               | OB_T2          | 41.0701 N   | 9.8012 E | 41.0681 N | 9.8012 E | 236    | 126-140 | 17      | 0.3     | 0.5     | E         |
|               | OB_T3          | 41.0705 N   | 9.7981 E | 41.0698 N | 9.7973 E | 221    | 100-120 | 37      | 0.9     | -0.018  | N         |
| Tavolara      | TV_T1          | 40.9119 N   | 9.9153 E | 40.9107 N | 9.9158 E | 206    | 175-201 | 14      | 0.2     | 0.018   | S         |
|               | TV_T2          | 40.9139 N   | 9.9002 E | 40.9132 N | 9.9014 E | 261    | 107-140 | 27      | 0.5     | 0.13    | E         |
|               | TV_T3          | 40.9195 N   | 9.9018 E | 40.9186 N | 9.9029 E | 310    | 144-196 | 56      | 1.6     | 0.018   | E         |
| Orosei        | OR_T1          | 40.3636 N   | 9.8942 E | 40.3644 N | 9.8941 E | 265    | 95-101  | 21      | 1.3     | 0.58    | W         |
|               | OR_T2          | 40.3646 N   | 9.8944 E | 40.3658 N | 9.8951 E | 302    | 93-117  | 55      | 1.9     | -0.035  | W         |
|               | OR_T3          | 40.3628 N   | 9.8943 E | 40.3635 N | 9.8944 E | 219    | 96-100  | 66      | 2.2     | -0.11   | S         |
| Arbatax       | AR_T1          | 39.9684 N   | 9.7282 E | 39.9680 N | 9.7293 E | 237    | 108-143 | 40      | 0.8     | 0.017   | N         |
|               | AR_T2          | 39.9681 N   | 9.7299 E | 39.9675 N | 9.7314 E | 241    | 139-171 | 39      | 0.7     | -0.033  | N         |
|               | AR_T3          | 39.9675 N   | 9.7316 E | 39.9668 N | 9.7322 E | 201    | 128-183 | 39      | 0.7     | -0.046  | N         |
| Porto Corallo | PC_T1          | 39.4297 N   | 9.7918 E | 39.4283 N | 9.7929 E | 240    | 90-126  | 25      | 1       | -0.14   | S         |
|               | PC_T2          | 39.4239 N   | 9.7922 E | 39.4237 N | 9.7942 E | 301    | 82-111  | 17      | 2       | 0.06    | W         |
|               | PC_T3          | 39.4238 N   | 9.7948 E | 39.4214 N | 9.7933 E | 200    | 83-102  | 18      | 3.1     | 0.01    | W         |
| Carloforte    | CR_T1          | 39.2312 N   | 8.0018 E | 39.2310 N | 8.0028 E | 254    | 192-198 | 10      | 0.1     | 0.002   | S         |
|               | CR_T2          | 39.2309 N   | 8.0027 E | 39.2304 N | 8.0031 E | 210    | 188-195 | 16      | 0.2     | 0.02    | S         |
|               | CR_T3          | 39.2303 N   | 8.0032 E | 39.2316 N | 8.0044 E | 201    | 184-192 | 10      | 0.1     | 0.002   | S         |

**Table S2.** A) Reference scores developed for the 12 components used in the MACS index. H, height; GL, general litter; LFG, lost fishing gears. B) Scores defining the environmental status classes for Is, Ii and MACS. Both tables are from Enrichetti et al. (2019).

A)

| Components                                        | Score 0                       | Score 1            | Score 2                 | Score 3            |
|---------------------------------------------------|-------------------------------|--------------------|-------------------------|--------------------|
| <b>Index of Status (Is)</b>                       |                               |                    |                         |                    |
| Species richness (SR)                             | 0                             | ≤20                | >20 ≤40                 | >40                |
| Basal bio-cover (BC)                              | 0                             | <1.5               | ≥1.5 <2.5               | ≥2.5               |
| Coralline algae cover (CC)                        | 0                             | <1.5               | ≥1.5 <2.5               | ≥2.5               |
| Dominance of structuring species (DM)             | SSD ≤ 0.5 org m <sup>-2</sup> | 1 sp.              | 2 sp.                   | ≥3 spp.            |
| Density of all structuring species (SSD)          | SSD ≤ 0.5 org m <sup>-2</sup> | ≤2                 | >20 ≤5                  | >5                 |
| Mean height of dominant structuring species (SSH) | SSD ≤ 0.5 org m <sup>-2</sup> | ≤ 1/3 of 1/2 max H | > 1/3 ≤2/3 of 1/2 max H | > 2/3 of 1/2 max H |
| <b>Index of Impact (Ii)</b>                       |                               |                    |                         |                    |
| Sedimentation (S)                                 | 0                             | <1.5               | ≥1.5 <2.5               | ≥2.5               |
| Percent of entangled colonies (ENT)               | 0                             | ≤20                | >20 ≤40                 | >40                |
| Percent of necrotic colonies (ENT)                | 0                             | ≤20                | >20 ≤40                 | >40                |
| Percent of epibioneted colonies (EPB)             | 0                             | ≤20                | >20 ≤40                 | >40                |
| Density of litter items (LD)                      | 0                             | ≤0.1               | >0.1 ≤0.2               | >0.2               |
| Litter typology (LT)                              | Absence of litter             | Presence of GL     | Presence of LFG         | GL+LFG             |

B)

| Index of Status (Is) | Index of Impact (Ii) | MACS             |
|----------------------|----------------------|------------------|
| ≤ 35 = Bad           | ≤ 35 = Bad           | ≤ 35 = Bad       |
| 36-45 = Poor         | 36-45 = Poor         | 36-45 = Poor     |
| 46-55 = Moderate     | 46-55 = Moderate     | 46-55 = Moderate |
| 56-65 = Good         | 56-65 = Good         | 56-65 = Good     |
| ≥ 66 = High          | ≥ 66 = High          | ≥ 66 = High      |



**Table S3.** List of species recorded within the investigated sites.

| Phylum   | Species                            | Caprera | Orosei | Arbatax | Olbia | Porto Corallo | Tavolara | Carloforte |
|----------|------------------------------------|---------|--------|---------|-------|---------------|----------|------------|
| Porifera | <i>Aplysina</i> spp.               |         | +      |         |       | +             |          |            |
|          | <i>Axinella</i> spp.               | +       | +      | +       | +     | +             | +        |            |
|          | <i>Haliclona</i> spp.              |         |        |         |       |               |          | +          |
|          | <i>Encrusting orange spongeia</i>  |         |        | +       | +     |               |          |            |
|          | <i>Encrusting white spongeia</i>   |         |        | +       | +     |               |          |            |
|          | <i>Encrusting blue spongeia</i>    |         |        | +       |       |               |          |            |
|          | <i>Encrusting gray spongeia</i>    |         |        |         |       | +             |          |            |
|          | <i>Erect brown spongeia</i>        | +       | +      |         |       | +             | +        | +          |
|          | <i>Erect white spongeia</i>        | +       | +      |         | +     | +             | +        | +          |
|          | <i>Erect yellow spongeia</i>       | +       |        |         | +     | +             | +        | +          |
|          | <i>Erect orange spongeia</i>       |         | +      |         | +     | +             | +        |            |
|          | <i>Pachastrella monilifera</i>     | +       |        | +       | +     | +             |          | +          |
|          | <i>Poecillastra compressa</i>      | +       | +      | +       | +     | +             |          |            |
|          | <i>Terpios gelatinosa</i>          | +       |        |         |       |               |          | +          |
| Cnidaria | <i>Hidrozoa</i> spp.               | +       | +      |         | +     | +             | +        | +          |
|          | <i>Sertulariidae</i> spp.          | +       | +      | +       |       | +             | +        | +          |
|          | <i>Anthipates dichotoma</i>        |         |        | +       | +     |               | +        | +          |
|          | <i>Antipathes subpinnata</i>       | +       | +      | +       | +     | +             | +        |            |
|          | <i>Caryophyllia</i> spp.           | +       | +      | +       | +     | +             | +        | +          |
|          | <i>Cerianthus</i> sp.              |         | +      |         |       | +             | +        |            |
|          | <i>Dendrophyllia cornigera</i>     | +       | +      | +       | +     | +             | +        |            |
|          | <i>Desmophyllum dianthus</i>       | +       |        | +       |       |               |          | +          |
|          | <i>Leiopathes glaberrima</i>       |         |        |         |       |               | +        | +          |
|          | <i>Madrepora oculata</i>           |         |        |         |       |               | +        |            |
|          | <i>Parantipathes larix</i>         | +       |        | +       | +     |               | +        | +          |
|          | <i>Savalia savaglia</i>            |         | +      |         |       |               |          |            |
|          | <i>Parazoanthus axinellae</i>      | +       | +      |         |       | +             | +        | +          |
|          | <i>Acanthogorgia hirsuta</i>       | +       |        |         |       | +             | +        | +          |
|          | <i>Alcynium</i> spp.               | +       | +      | +       | +     |               | +        |            |
|          | <i>Bebryce mollis</i>              |         | +      |         |       |               | +        | +          |
|          | <i>Callogorgia verticillata</i>    | +       |        | +       | +     |               | +        | +          |
|          | <i>Corallium rubrum</i>            | +       | +      | +       | +     | +             | +        |            |
|          | <i>Eunicella cavolini</i>          | +       | +      |         | +     |               | +        |            |
|          | <i>Paramuricea clavata</i>         |         | +      |         |       |               | +        |            |
|          | <i>Gerardia savaglia</i>           |         |        |         |       | +             |          |            |
|          | <i>Villogorgia bebrycoides</i>     | +       |        |         |       |               | +        |            |
|          | <i>Viminella flagellum</i>         | +       |        |         | +     |               | +        |            |
| Annelida | <i>Serpulidae</i> sp.              | +       | +      | +       | +     | +             | +        | +          |
|          | <i>Salmacina-Filigrana implexa</i> | +       | +      | +       | +     | +             | +        |            |

|                      |                                    |   |   |   |   |   |   |   |
|----------------------|------------------------------------|---|---|---|---|---|---|---|
|                      | <i>Sabella sp.</i>                 |   |   | + |   | + |   |   |
| <i>Tunicata</i>      | <i>Halocynthia papillosa</i>       |   | + |   |   | + |   |   |
|                      | <i>Ascidia sp.</i>                 |   |   |   |   | + | + |   |
| <i>Annelida</i>      | <i>Bonellia viridis</i>            | + | + |   | + | + | + | + |
| <i>Brachiopoda</i>   | <i>Gryphus vitreus</i>             | + |   |   |   |   |   |   |
| <i>Mollusca</i>      | <i>Pseudosimnia carnea</i>         |   |   |   |   | + |   |   |
|                      | <i>Gastropoda sp. 1</i>            |   |   |   |   |   | + |   |
|                      | <i>Gastropoda sp. 2</i>            |   |   |   |   | + | + |   |
|                      | <i>Nudibranchs sp.</i>             | + |   |   |   |   | + | + |
|                      | <i>Peltdoris atromaculata</i>      |   | + |   |   | + |   |   |
|                      | <i>Ostrea sp.</i>                  |   | + |   | + | + | + |   |
| <i>Arthropoda</i>    | <i>Plesionika sp.</i>              |   |   |   |   | + |   |   |
|                      | <i>Crusyacea sp.</i>               |   |   |   |   |   | + |   |
|                      | <i>Munida sp.</i>                  |   | + |   |   |   |   |   |
|                      | <i>Rochinia rissoana</i>           |   |   |   |   |   |   | + |
|                      | <i>Pagurus sp.</i>                 |   |   |   |   |   | + |   |
|                      | <i>Palinurus elephas</i>           |   | + |   | + | + | + | + |
| <i>Bryozoa</i>       | <i>Reteporella grimaldii</i>       | + | + |   |   |   | + |   |
|                      | <i>Myriapora truncata</i>          |   | + |   |   | + | + |   |
|                      | <i>Reteporella beaniana</i>        |   |   |   |   |   | + |   |
| <i>Echinodermata</i> | <i>Echinaster sepositus</i>        |   |   | + | + |   |   |   |
|                      | <i>Centrostephanus longispinus</i> |   |   |   | + | + |   |   |
|                      | <i>Cidaridae sp.</i>               |   | + | + | + | + | + |   |
|                      | <i>Echinus melo</i>                | + | + |   | + |   | + |   |
|                      | <i>Holothuria sp. 1</i>            |   | + |   |   |   |   |   |
|                      | <i>Holothuria sp. 2</i>            |   | + | + | + | + | + |   |
|                      | <i>Hacelia attenuata</i>           | + | + |   |   | + | + |   |
|                      | <i>A. mediterranea</i>             | + | + |   | + |   | + | + |
|                      | <i>Ophiothrix sp.</i>              | + |   |   |   |   | + | + |
|                      | <i>Peltaster placenta</i>          | + | + | + | + | + | + |   |
| <i>Chordata</i>      | <i>Antias antias</i>               |   |   | + | + | + |   |   |
|                      | <i>Benthecomete robustus</i>       |   |   |   |   |   | + |   |
|                      | <i>Scorpaena notata</i>            |   | + |   | + | + |   |   |
|                      | <i>Helycodenus dactylopterus</i>   |   |   |   | + |   |   |   |
|                      | <i>Murena elena</i>                | + |   |   |   |   | + |   |
|                      | <i>Galeus melastomus</i>           | + |   |   |   |   |   |   |
|                      | <i>Cerranus hepatus</i>            |   |   |   | + |   |   |   |
|                      | <i>Acantholabrus palloni</i>       | + |   | + |   |   |   | + |
